# Supplementary material
Source: PubMed Central journal article supplement (PMC5718267)
Supplement: CJN.03280317SupplementaryData1.pdf [file CJN.03280317SupplementaryData1.pdf]

Hugh C. Rayner <sup>1</sup>, Maria Larkina <sup>2</sup>, Mia Wang <sup>2</sup>, Matthew Graham-Brown <sup>3</sup>, Sabine N van der Veer <sup>4</sup>,  
Tevfik Ecder <sup>5</sup>, Takeshi Hasegawa <sup>6</sup>, Werner Kleophas <sup>7,8</sup>, Brian A. Bieber <sup>2,6</sup>, Francesca Tentori <sup>2,9</sup>, Bruce M.  
Robinson, <sup>2,10</sup>, Ronald L. Pisoni, <sup>2</sup>

1. Department of Renal Medicine, Heart of England National Health Service Foundation Trust, UK
2. Arbor Research Collaborative for Health, Ann Arbor MI, USA
3. John Walls Renal Unit, University Hospitals of Leicester National Health Service Trust, Leicester, UK
4. Centre for Health Informatics, Division of Informatics, Imaging and Data Sciences, Faculty of Biology, Medicine and Health, Manchester Academic Health Science Centre, The University of Manchester, Manchester, UK
5. Department of Internal Medicine Division of Nephrology, Istanbul Bilim University Faculty of Medicine, Istanbul, Turkey
6. Office for Promoting Medical Research, Showa University; Division of Nephrology, Department of Medicine, Showa University Fujigaoka Hospital, Japan
7. MVZ Davita Rhein-Ruhr, Division of Nephrology, Duesseldorf, Germany
8. Heinrich-Heine-University, Nephrology Clinic, Duesseldorf, Germany
9. Department of Medicine, Vanderbilt University, Nashville TN, USA
10. Department of Internal Medicine, University of Michigan, Ann Arbor, MI, USA
