# Supplementary material
Source: PubMed Central journal article supplement (PMC5718267)
Supplement: CJN.03280317SupplementaryData2.pdf [file CJN.03280317SupplementaryData2.pdf]

*Supplemental material is neither peer-reviewed nor thoroughly edited by CJASN. The authors alone are responsible for the accuracy and presentation of the material.*

**Supplementary Materials:**

Links to the following videos are also available online underneath the article abstract.

- 1. Supplementary Video 1: Itching due to kidney failure – A patient’s experience**  
([vimeo.com/49458473](https://vimeo.com/49458473))
- 2. Supplementary Video 2: Gabapentin treatment for itching – A patient’s experience** ([vimeo.com/49455976](https://vimeo.com/49455976))

**Supplementary Table 1:** Patient characteristics according to the extent to which patients were bothered by itchy skin. (Expanded Table 1 showing categories of lab measures and p-values)

|                                            | To what extent were you bothered by itchy skin during the past 4 weeks? |          |            |           |           | AOR <sup>A</sup><br>[95% CI] |
|--------------------------------------------|-------------------------------------------------------------------------|----------|------------|-----------|-----------|------------------------------|
|                                            | Not at all                                                              | Somewhat | Moderately | Very much | Extremely |                              |
| <b>Total sample, N</b>                     | 2111                                                                    | 1840     | 1188       | 692       | 425       |                              |
| <b>Total sample, %</b>                     | 34                                                                      | 29       | 19         | 11        | 7         |                              |
| <b>Patient characteristics:</b>            |                                                                         |          |            |           |           |                              |
| <b>Male</b>                                | 60                                                                      | 59       | 60         | 60        | 59        | 1.01<br>[0.91, 1.12]         |
| <b>Age, years</b>                          | 62(15)                                                                  | 62(15)   | 63(15)     | 63(15)    | 64(15)    | 1.06<br>[1.02, 1.10]         |
| <b>Time on dialysis, years</b>             |                                                                         |          |            |           |           |                              |
| < 0.25                                     | 8                                                                       | 5        | 6          | 6         | 7         | 0.98<br>[0.83, 1.15]         |
| 0.25 - <1                                  | 12                                                                      | 11       | 11         | 14        | 12        | 1.01<br>[0.88, 1.15]         |
| 1 - <5                                     | 45                                                                      | 45       | 47         | 46        | 48        | 1.00<br>[reference]          |
| 5 - <10                                    | 19                                                                      | 23       | 22         | 19        | 19        | 1.03<br>[0.92, 1.15]         |
| ≥ 10                                       | 16                                                                      | 17       | 14         | 15        | 14        | 0.97<br>[0.85, 1.09]         |
| <b>BMI, kg/m<sup>2</sup></b>               | 26(6)                                                                   | 25(6)    | 26(7)      | 26(6)     | 26(7)     | 1.05<br>[1.00, 1.11]         |
| <b>Treatment time (min)</b>                | 237(34)                                                                 | 237(35)  | 235(31)    | 232(32)   | 232(28)   | 0.99<br>[0.97, 1.00]         |
| <b>Hemodiafiltration (HDF)<sup>B</sup></b> |                                                                         |          |            |           |           |                              |
| Non-HDF                                    | 82                                                                      | 85       | 84         | 85        | 84        | 1.00<br>[reference]          |
| HDF 4-15 L                                 | 3                                                                       | 4        | 5          | 3         | 5         | 1.04<br>[0.78, 1.37]         |
| HDF 15-20 L                                | 5                                                                       | 3        | 4          | 4         | 3         | 1.01<br>[0.77, 1.32]         |
| HDF >20 L                                  | 11                                                                      | 8        | 8          | 9         | 8         | 0.92                         |

Supplemental material is neither peer-reviewed nor thoroughly edited by CJASN. The authors alone are responsible for the accuracy and presentation of the material.

|                                  |           |           |           |           |           |                      |
|----------------------------------|-----------|-----------|-----------|-----------|-----------|----------------------|
|                                  |           |           |           |           |           | [0.72, 1.17]         |
| <b>Smoker <sup>c</sup></b>       | 19        | 21        | 22        | 24        | 21        | 1.15<br>[0.97, 1.35] |
| <b>Hepatitis B/C</b>             | 6         | 8         | 9         | 9         | 9         | 1.26<br>[1.06, 1.50] |
| <b>Labs:</b>                     |           |           |           |           |           |                      |
| <b>Hemoglobin, g/dL</b>          | 11.0(1.4) | 11.0(1.4) | 11.0(1.4) | 11.0(1.4) | 10.9(1.5) | 0.99<br>[0.95, 1.03] |
| <b>PTH, pg/mL</b>                | 355(416)  | 348(449)  | 346(496)  | 322(345)  | 349(430)  | 0.99<br>[0.98, 1.01] |
| <b>White Blood Cell count</b>    |           |           |           |           |           |                      |
| <5400                            | 29        | 30        | 28        | 27        | 27        | 1.00<br>[reference]  |
| 5400 - <6700                     | 24        | 25        | 27        | 27        | 24        | 1.07<br>[0.98, 1.18] |
| 6700 - <8400                     | 28        | 25        | 25        | 27        | 22        | 0.93<br>[0.85, 1.03] |
| ≥ 8400                           | 19        | 20        | 20        | 20        | 26        | 1.08<br>[0.98, 1.19] |
| <b>Albumin (g/dL)</b>            |           |           |           |           |           |                      |
| < 3.5                            | 23        | 23        | 26        | 28        | 34        | 1.14<br>[1.04, 1.25] |
| 3.5 - <4.0                       | 42        | 44        | 43        | 44        | 40        | 1.00<br>[reference]  |
| ≥ 4.0                            | 34        | 33        | 30        | 28        | 26        | 0.87<br>[0.80, 0.95] |
| <b>Albumin (g/dL) continuous</b> | 3.8(0.5)  | 3.7(0.5)  | 3.7(0.5)  | 3.7(0.5)  | 3.7(0.5)  | 0.86<br>[0.75, 0.98] |
| <b>Ferritin (ng/mL)</b>          |           |           |           |           |           |                      |
| < 100                            | 17        | 24        | 18        | 18        | 18        | 0.92<br>[0.79, 1.06] |
| 100 - <400                       | 32        | 30        | 33        | 33        | 32        | 1.00<br>[reference]  |
| 400 - <800                       | 29        | 28        | 30        | 30        | 31        | 1.03<br>[0.92, 1.15] |
| ≥ 800                            | 23        | 18        | 19        | 19        | 19        | 1.01<br>[0.89, 1.14] |
| <b>Calcium (mg/dL)</b>           |           |           |           |           |           |                      |
| < 8.4                            | 21        | 22        | 24        | 23        | 21        | 1.02<br>[0.91, 1.15] |

Supplemental material is neither peer-reviewed nor thoroughly edited by CJASN. The authors alone are responsible for the accuracy and presentation of the material.

|                                                                             |                  |                  |                  |                   |                   |                      |
|-----------------------------------------------------------------------------|------------------|------------------|------------------|-------------------|-------------------|----------------------|
| 8.4 - <9.5                                                                  | 57               | 56               | 55               | 53                | 58                | 1.00<br>[reference]  |
| 9.5 - <10.2                                                                 | 18               | 17               | 16               | 19                | 19                | 1.02<br>[0.89, 1.15] |
| ≥ 10.2                                                                      | 4                | 5                | 5                | 4                 | 3                 | 0.98<br>[0.80, 1.21] |
| <b>Phosphorus<br/>(mg/dL)</b>                                               |                  |                  |                  |                   |                   |                      |
| < 3.5                                                                       | 11               | 11               | 13               | 11                | 13                | 1.00<br>[0.88, 1.14] |
| 3.5 - <5.5                                                                  | 56               | 51               | 52               | 51                | 50                | 1.00<br>[reference]  |
| 5.5 - <6.7                                                                  | 20               | 23               | 21               | 22                | 20                | 1.01<br>[0.91, 1.13] |
| ≥ 6.7                                                                       | 13               | 15               | 14               | 15                | 16                | 1.07<br>[0.95, 1.21] |
| <b>Calcium x<br/>Phosphorus<br/>product (mg<sup>2</sup>/dL<sup>2</sup>)</b> | 43[36,52]        | 45[36,55]        | 44[35,52]        | 44[36,53]         | 44[36,54]         | 1.02<br>[0.98, 1.06] |
| <b>Single Pool Kt/V</b>                                                     |                  |                  |                  |                   |                   |                      |
| < 1.2                                                                       | 14               | 18               | 17               | 18                | 19                | 1.00<br>[reference]  |
| 1.2 - <1.5                                                                  | 33               | 34               | 34               | 35                | 34                | 1.02<br>[0.92, 1.13] |
| ≥ 1.5                                                                       | 53               | 49               | 49               | 47                | 47                | 0.95<br>[0.86, 1.04] |
| <b>CRP (mg/L) <sup>D</sup></b>                                              |                  |                  |                  |                   |                   |                      |
| < 1                                                                         | 24               | 24               | 23               | 25                | 17                | 1.00<br>[reference]  |
| 1 - <3                                                                      | 25               | 28               | 22               | 19                | 20                | 0.77 (0.65,<br>0.91) |
| 3 - <5                                                                      | 13               | 13               | 9                | 10                | 8                 | 0.68 (0.52,<br>0.90) |
| 5 - <10                                                                     | 17               | 18               | 22               | 21                | 18                | 1.18 (0.94,<br>1.47) |
| 10 - <15                                                                    | 7                | 5                | 8                | 7                 | 10                | 1.39 (1.06,<br>1.83) |
| ≥ 15                                                                        | 14               | 13               | 16               | 18                | 26                | 1.31 (1.05,<br>1.64) |
| <b>CRP (mg/L) <sup>D</sup><br/>continuous</b>                               | 3.0<br>[1.0,8.0] | 2.7<br>[1.0,7.0] | 4.0<br>[1.0,9.7] | 4.0<br>[1.0,10.5] | 5.3<br>[1.7,15.8] | 1.00<br>[1.00, 1.01] |

Footnote: Data shown as mean (standard deviation), median [interquartile range], or column percent.

Non-response rate was 27% overall, varying from 9% in Turkey to 46% in Canada.

A. Each variable tested in separate logistic regression model with moderately to severely being bothered by itchy skin as the outcome accounting for facility clustering and adjusting for age, sex, vintage, 13 summary comorbidities (coronary artery disease, cancer, other cardiovascular disease, cerebrovascular disease, congestive heart failure, diabetes mellitus, gastrointestinal bleeding, hypertension, lung disease, neurologic disorder, psychological disorder, peripheral vascular disease, recurrent cellulitis), and country. Adjusted odds ratio (95% confidence interval) shown for age per 10 years, BMI per 5 kg/m<sup>2</sup>, treatment time per 10 minutes, calcium phosphorus product per 10 mg<sup>2</sup>/dL<sup>2</sup>.

B. Hemodiafiltration (HDF) measure excludes US and Canada due to lack of use; n=4774

C. Smoker defined as someone indicating being a current smoker or stopped smoking within past year

D. CRP is restricted to facilities that reported measurement in at least 50% of patients (excludes US), n=2066

**Supplementary Table 2**

| What time of the day is the itch most bothersome? |      |     | When is the itch most bothersome in relation to your dialysis treatments? |      |     |
|---------------------------------------------------|------|-----|---------------------------------------------------------------------------|------|-----|
|                                                   | %    | N   |                                                                           | %    | N   |
| <b>1: Morning</b>                                 | 5%   | 43  | <b>1: Soon before the dialysis session</b>                                | 2%   | 20  |
| <b>2: Afternoon</b>                               | 3%   | 31  | <b>2: During the dialysis session</b>                                     | 15%  | 138 |
| <b>3: Evening</b>                                 | 15%  | 145 | <b>3: Soon after the dialysis</b>                                         | 9%   | 85  |
| <b>4: At night</b>                                | 30%  | 282 | <b>4: On non-dialysis days</b>                                            | 14%  | 128 |
| <b>5: No specific time, or most all times</b>     | 48%  | 454 | <b>5: No specific time, or most all times</b>                             | 61%  | 576 |
| <b>All</b>                                        | 100% | 955 | <b>All</b>                                                                | 100% | 947 |

Time of day and timing in relation to dialysis treatment that itch is most bothersome in patients who answered 'Yes' to question 'Are you bothered at all by itchy skin?'

Supplemental material is neither peer-reviewed nor thoroughly edited by CJASN. The authors alone are responsible for the accuracy and presentation of the material.

**Supplementary Table 3:** Health care providers that patients spoke with about their itchy skin.

|                              | Overall bothered by itchy skin | Nearly Always or Always bothered by itchy skin |     |     |     |     |     |     |     |     |     |     |     |     |
|------------------------------|--------------------------------|------------------------------------------------|-----|-----|-----|-----|-----|-----|-----|-----|-----|-----|-----|-----|
|                              |                                | All                                            | Bel | Can | GCC | Ger | Ita | Jpn | Rus | Spa | Swe | Tur | UK  | US  |
| <b>Nephrologist</b>          | 42%                            | 46%                                            | 59% | 59% | 70% | 46% | 84% | 34% | 62% | 55% | 71% | 26% | 46% | 26% |
| <b>Nurses or other staff</b> | 32%                            | 37%                                            | 26% | 51% | 23% | 33% | 35% | 44% | 29% | 36% | 41% | 31% | 32% | 39% |
| <b>Skin doctor</b>           | 18%                            | 24%                                            | 26% | 16% | 31% | 32% | 38% | 27% | 11% | 15% | 18% | 31% | 16% | 17% |
| <b>Primary care doctor</b>   | 16%                            | 19%                                            | 4%  | 27% | 2%  | 33% | 24% | 9%  | 29% | 15% | 9%  | 21% | 44% | 37% |
| <b>None</b>                  | 25%                            | 17%                                            | 11% | 18% | 12% | 14% | 8%  | 13% | 12% | 19% | 21% | 19% | 19% | 33% |
| <b>Total responders:</b>     | 2522                           | 999                                            | 27  | 49  | 98  | 57  | 37  | 338 | 73  | 73  | 34  | 42  | 57  | 114 |

Footnote: Question wording: ‘What health care providers have you spoken with about your itchy skin (choose all that apply)?’; restricted to patients who answered ‘Yes’ to question ‘Are you bothered at all by itchy skin?’ (presented in ‘Overall’ column) and also selected 5 or 6 (‘Nearly Always or Always bothered’) on 0-6 scale in response to ‘During the past week, how often have you been bothered by: your itching?’.

ANZ = Australia and New Zealand, Bel = Belgium, Can = Canada, Chi = China, GCC = the six Gulf Cooperation Council countries (Bahrain, Qatar, Kuwait, Oman, Saudi Arabia, and United Arab Emirates), Ger = Germany, Ita = Italy, Jpn = Japan, Rus = Russia, Spa = Spain, Swe = Sweden, Tur = Turkey, UK = the United Kingdom, US = the United States of America.

Supplemental material is neither peer-reviewed nor thoroughly edited by CJASN. The authors alone are responsible for the accuracy and presentation of the material.

**Supplementary Table 4:** Health care providers that prescribed treatments/medications for patients with itchy skin.

|                              | Overall bothered by itchy skin | Nearly Always or Always bothered by itchy skin |     |     |     |     |     |     |     |     |     |     |     |     |
|------------------------------|--------------------------------|------------------------------------------------|-----|-----|-----|-----|-----|-----|-----|-----|-----|-----|-----|-----|
|                              |                                | All                                            | Bel | Can | GCC | Ger | Ita | Jpn | Rus | Spa | Swe | Tur | UK  | US  |
| <b>Nephrologist</b>          | 52%                            | 52%                                            | 55% | 59% | 79% | 49% | 69% | 46% | 60% | 68% | 89% | 33% | 29% | 27% |
| <b>Nurses or other staff</b> | 23%                            | 23%                                            | 18% | 24% | 11% | 16% | 0%  | 30% | 13% | 25% | 18% | 33% | 7%  | 36% |
| <b>Skin doctor</b>           | 24%                            | 26%                                            | 32% | 26% | 33% | 33% | 31% | 28% | 17% | 17% | 18% | 33% | 17% | 21% |
| <b>Primary care doctor</b>   | 19%                            | 18%                                            | 14% | 26% | 0%  | 21% | 29% | 8%  | 25% | 13% | 14% | 20% | 59% | 46% |
| <b>Total responders:</b>     | 1927                           | 832                                            | 22  | 34  | 91  | 43  | 35  | 314 | 53  | 53  | 28  | 40  | 41  | 78  |

Footnote: Question wording: ‘Which health care providers have prescribed treatments/medications for your itchy skin (choose all that apply)?’; restricted to patients who answered ‘Yes’ to question ‘Are you bothered at all by itchy skin?’ (presented in ‘Overall’ column) and also selected 5 or 6 (‘Nearly Always or Always bothered’) on 0-6 scale in response to ‘During the past week, how often have you been bothered by: your itching?’.

ANZ = Australia and New Zealand, Bel = Belgium, Can = Canada, Chi = China, GCC = the six Gulf Cooperation Council countries (Bahrain, Qatar, Kuwait, Oman, Saudi Arabia, and United Arab Emirates), Ger = Germany, Ita = Italy, Jpn = Japan, Rus = Russia, Spa = Spain, Swe = Sweden, Tur = Turkey, UK = the United Kingdom, US = the United States of America.



**Supplementary Table 5:** Medical Director’s ranking of therapeutic options for patients with severe pruritus.

| % of Medical Directors                                                              | Rank of Importance |     |     |     |           |
|-------------------------------------------------------------------------------------|--------------------|-----|-----|-----|-----------|
|                                                                                     | 1 (most)           | 2   | 3   | 4   | 5 (least) |
| <b>Increasing dialysis dose (in patients with low Kt/V)</b>                         | 15%                | 25% | 29% | 24% | 6%        |
| <b>Phosphorus control (in patients with high serum phosphorus)</b>                  | 60%                | 16% | 15% | 8%  | 1%        |
| <b>Lowering PTH levels (in patients with high PTH)</b>                              | 2%                 | 26% | 21% | 28% | 23%       |
| <b>Use of prescription medications for pruritus</b>                                 | 13%                | 15% | 13% | 14% | 45%       |
| <b>Increasing prescribed treatment time (in patients with short treatment time)</b> | 11%                | 18% | 21% | 26% | 24%       |

Footnote: Question wording: ‘Please rank the following therapeutic options for patients with severe pruritus in order of importance (from 1 to 5, with 1 being most important)’; restricted to complete responses, N=241

**Supplementary Table 6:** Treatments/medications patient was taking to relieve itchy skin.

|                                         | Overall bothered by itchy skin | Nearly Always or Always bothered by itchy skin |     |     |     |     |     |     |     |     |     |     |     |     |
|-----------------------------------------|--------------------------------|------------------------------------------------|-----|-----|-----|-----|-----|-----|-----|-----|-----|-----|-----|-----|
|                                         |                                | All                                            | Bel | Can | GCC | Ger | Ita | Jpn | Rus | Spa | Swe | Tur | UK  | US  |
| <b>Non-Rx topical</b>                   | 29%                            | 30%                                            | 21% | 51% | 42% | 51% | 24% | 17% | 35% | 29% | 36% | 12% | 25% | 45% |
| <b>Rx topical</b>                       | 38%                            | 44%                                            | 36% | 31% | 33% | 25% | 38% | 72% | 6%  | 26% | 42% | 36% | 46% | 23% |
| <b>Non-Rx oral</b>                      | 7%                             | 7%                                             | 4%  | 4%  | 14% | 5%  | 11% | 1%  | 17% | 4%  | 3%  | 12% | 4%  | 14% |
| <b>Rx oral</b>                          | 19%                            | 22%                                            | 29% | 24% | 24% | 12% | 38% | 22% | 7%  | 30% | 45% | 31% | 15% | 17% |
| <b>Ultraviolet (UV) light treatment</b> | 1%                             | 1%                                             | 0%  | 0%  | 3%  | 0%  | 0%  | 1%  | 1%  | 1%  | 0%  | 0%  | 0%  | 0%  |
| <b>None</b>                             | 25%                            | 18%                                            | 21% | 16% | 9%  | 23% | 19% | 8%  | 45% | 26% | 9%  | 26% | 29% | 29% |
| <b>Total responders:</b>                | 2434                           | 971                                            | 28  | 45  | 97  | 57  | 37  | 334 | 69  | 69  | 33  | 42  | 52  | 108 |

Footnote: Question wording: ‘What treatments/medications are you currently taking to relieve your itchy skin (choose all that apply)?’; restricted to patients who answered ‘Yes’ to question ‘Are you bothered at all by itchy skin?’ (presented in ‘Overall’ column) and also selected 5 or 6 (‘Nearly Always or Always bothered’) on 0-6 scale in response to ‘During the past week, how often have you been bothered by: your itching?’; Rx=prescription, non-Rx= non-prescription/over the counter, topical = topical (cream or ointment put on skin), oral = oral (medication taken by mouth). Among patients ‘nearly always or always bothered’, topical cream use (Rx or non-Rx) was 38%, and oral medication use (Rx or non-Rx) was 28%.

ANZ = Australia and New Zealand, Bel = Belgium, Can = Canada, Chi = China, GCC = the six Gulf Cooperation Council countries (Bahrain, Qatar, Kuwait, Oman, Saudi Arabia, and United Arab Emirates), Ger = Germany, Ita = Italy, Jpn = Japan, Rus = Russia, Spa = Spain, Swe = Sweden, Tur = Turkey, UK = the United Kingdom, US = the United States of America.

**Supplementary Table 7:** Medical Directors' drug options for patients with pruritus who are not referred to a specialist.

|                                               | <b>1: Chronic use, 1st line therapy</b> | <b>2: Chronic use, 2nd line therapy</b> | <b>3: Chronic use, 3rd line therapy</b> | <b>4: Acute use only (i.e., prescribe for 1 month or less)</b> | <b>5: I never prescribe for pruritus</b> | <b>N MDs</b> |
|-----------------------------------------------|-----------------------------------------|-----------------------------------------|-----------------------------------------|----------------------------------------------------------------|------------------------------------------|--------------|
| <b>Topical antihistamines</b>                 | 23%                                     | 9%                                      | 7%                                      | 24%                                                            | 36%                                      | 249          |
| <b>Oral antihistamines (over the counter)</b> | 32%                                     | 13%                                     | 3%                                      | 21%                                                            | 31%                                      | 238          |
| <b>Oral antihistamines (prescription)</b>     | 46%                                     | 24%                                     | 5%                                      | 19%                                                            | 7%                                       | 259          |
| <b>IV antihistamines</b>                      | 2%                                      | 6%                                      | 9%                                      | 35%                                                            | 48%                                      | 254          |
| <b>Topical corticosteroids</b>                | 9%                                      | 11%                                     | 12%                                     | 39%                                                            | 29%                                      | 256          |
| <b>Oral corticosteroids</b>                   | 2%                                      | 2%                                      | 4%                                      | 26%                                                            | 66%                                      | 253          |
| <b>IV corticosteroids</b>                     | 1%                                      | 1%                                      | 1%                                      | 18%                                                            | 79%                                      | 249          |
| <b>Gabapentin</b>                             | 5%                                      | 19%                                     | 21%                                     | 4%                                                             | 52%                                      | 198          |
| <b>Antidepressants</b>                        | 2%                                      | 8%                                      | 21%                                     | 8%                                                             | 60%                                      | 252          |
| <b>Anti-anxiolytics/sedatives</b>             | 2%                                      | 6%                                      | 20%                                     | 19%                                                            | 53%                                      | 251          |
| <b>Opioids</b>                                | 1%                                      | 5%                                      | 9%                                      | 6%                                                             | 79%                                      | 249          |

Footnote: Question wording: 'For chronic hemodialysis patients with pruritus whom you do not refer to a specialist, please describe your use of the following drugs options'. Medication use categories are not exclusive. Chronic use as 1<sup>st</sup> line therapy of prescription or non-prescription/over the counter oral antihistamines was 57%.

**Supplementary Figure 1:** Medical Directors’ estimates of the percentage of patients affected by severe pruritus in their unit, shown by percentage of patients reporting being very much or extremely bothered by itchy skin.

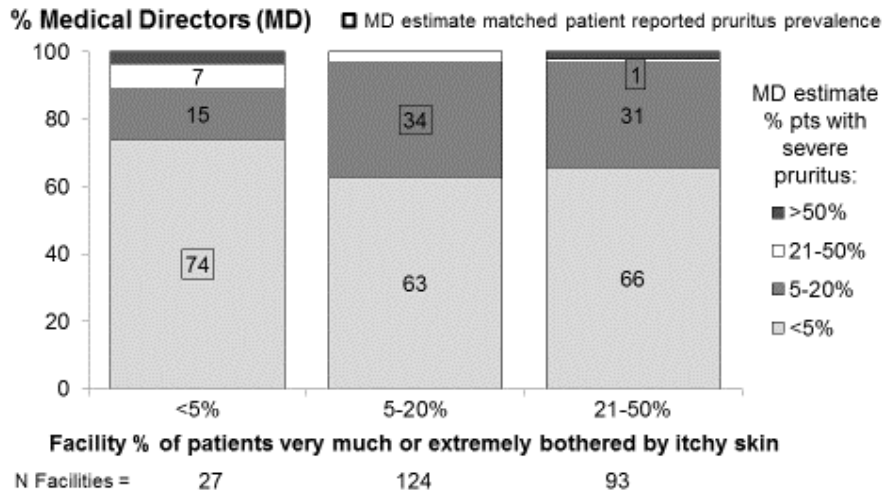

Footnote: Facilities were classified by categorizing % patients responding to question: “To what extent were you bothered by itchy skin during the past 4 weeks?” with ‘very much’ or ‘extremely’ at the time of facility recruitment into study (representative study cross section, facilities with <5 patient responses were excluded) and by medical director responses to question “Based on your current clinical practice, estimate the percent of patients with severe pruritus”.

**Supplementary Figure 2:** Variation between countries in Medical Directors' prescribing of gabapentin for pruritus.

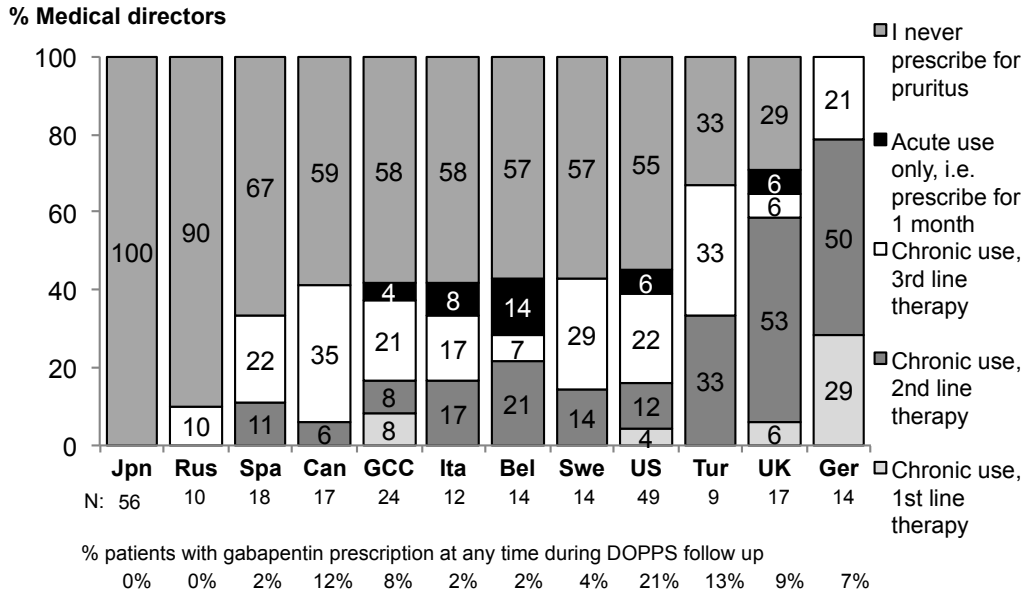

Question text: “For chronic hemodialysis patients with pruritus whom you do not refer to a specialist, please describe your use of the following drug options: Gabapentin”.

ANZ = Australia and New Zealand, Bel = Belgium, Can = Canada, Chi = China, GCC = the six Gulf Cooperation Council countries (Bahrain, Qatar, Kuwait, Oman, Saudi Arabia, and United Arab Emirates), Ger = Germany, Ita = Italy, Jpn = Japan, Rus = Russia, Spa = Spain, Swe = Sweden, Tur = Turkey, UK = the United Kingdom, US = the United States of America.
